# Supplementary material
Source: PubMed Central journal article supplement (PMC5570671)
Supplement: NIHMS859417-supplement-supplement_1.pdf [file NIHMS859417-supplement-supplement_1.pdf]

| Minutes<br>Time hh:mm | Normothermia |     |   | Hypothermia |     |    |
|-----------------------|--------------|-----|---|-------------|-----|----|
|                       | Mean         | SD  | N | Mean        | SD  | N  |
| 0:00:00               | 34.3         | 1.5 | 6 | 30.0        | 0.9 | 13 |
| 0:15:00               | 35.0         | 0.9 | 6 | 29.8        | 0.7 | 13 |
| 0:30:00               | 35.5         | 0.5 | 6 | 29.3        | 0.5 | 4  |
| 1:00:00               | 35.5         | 0.6 | 4 | 29.0        | 0.8 | 4  |
| 2:00:00               | 35.8         | 0.5 | 4 | 29.8        | 0.5 | 4  |
| 3:00:00               |              |     |   | 29.3        | 0.5 | 4  |
| 3:30:00               | 35.2         | 1.0 | 6 | 29.4        | 1.0 | 13 |

215x279mm (200 x 200 DPI)

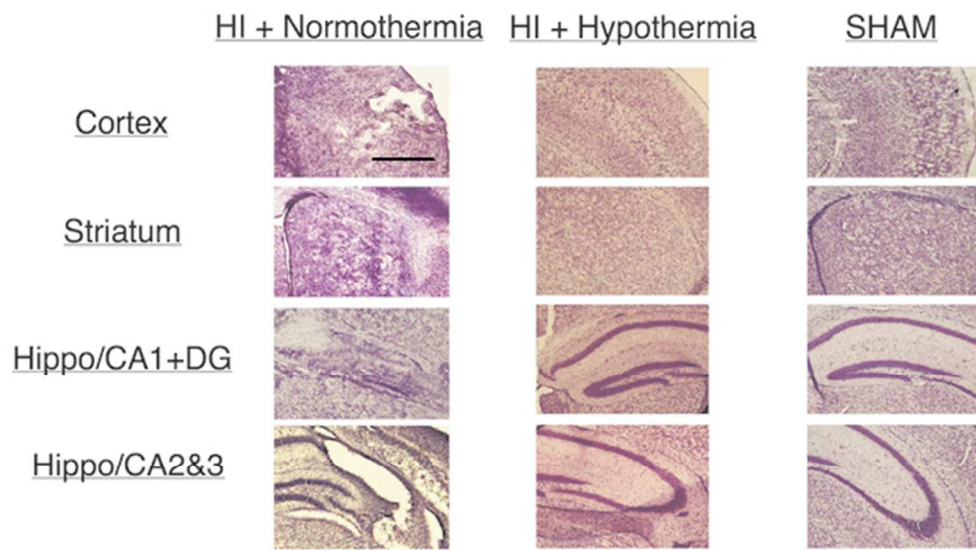

54x29mm (300 x 300 DPI)

Supplemental Figure S1. Temperature of pups were monitored using an infrared thermometer. The mean temperature and standard deviation of the normothermic and hypothermic treated samples were recorded.

Supplemental Figure S2. Histological samples used for evaluation. Cresyl violet stained histological sections used for scoring. Magnification is 10X. Scale bar = 100 um for all panels.
